# Supplementary material for: The association between physical activity and musculoskeletal disorders—a cross-sectional study of teachers
Source: PeerJ. 2023 Feb 22;11:e14872. doi: 10.7717/peerj.14872 (PMC9961098; doi:10.7717/peerj.14872)
Supplement: Supplemental Information 3 [file peerj-11-14872-s003.xlsx]

## Sheet: raw data
gender	age	body mass	body height	BMI	BMI-norm or overweight or obese	work as a teacher (years)	time spent sitting at work	time spent sitting at work and at home	12 month - neck pain, 1 if yes	schoulders	upper back	elbows	wrist/hand	low back	hip/thigh	knee	ankle/feet	7 days - neck pain, 1 if yes	schoulders	upper back	elbows	wrist/hand	low back	hip/thigh	knee	ankle/feet	intensity of the pain - if the pain occured within 7 days - neck	schoulders	upper back	elbows	wrist/hand	low back	hip/thigh	knee	ankle/feet	duration of sleep/week	other activities/week	MPA/week	VPAF/week	HVPA/week	duration of sleep/Mon-to-Friday	other activities/Mon-to-Friday	MPA/Mon-to-Friday	VPA/Mon-to-Friday	HVPA/Mon-to-Friday	duration of sleep/Satur-to-Sunday	other activities/Satur-to-Sunday	MPA/Satur-to-Sunday	VPA/Satur-to-Sunday
K	56	86	165	31.5886	4	>20	4-6 h	4-6 h	1	1	1	1	1	1	1	1	1	1	1	1	0	0	1	0	1	0	7	5				8		5		50	10440	480	0	0	34	7620	320	0	0	16	2820	160	0
K	33	98	184	28.9461	3	5-9 years	4-6 h	>8	0	0	0	0	0	1	0	1	1	0	0	0	0	0	1	0	1	1						6		6	4	50	10575	120	0	0	34	7717.5	60	0	0	16	2857.5	60	0
K	38	62	168	21.9671	2	15-20 years	4-6 h	4-6 h	0	1	0	1	0	0	0	1	0	0	0	0	1	0	0	0	1	0				4				2		53	10305	120	0	600	35	7567.5	60	0	400	18	2737.5	60	0
K	56	49	158	19.6283	2	>20	4-6 h	6-8 h	0	0	0	1	0	1	0	0	1	0	0	0	0	0	1	0	0	1						6			5	49	9135	4200	0	0	33	6795	2760	0	0	16	2340	1440	0
K	31	49	160	19.1406	2	5-9 years	4-6 h	4-6 h	0	0	0	0	0	0	0	0	0	0	0	0	0	0	0	0	0	0										55	9720	480	360	1800	38	6975	480	180	1200	17	2745	0	180
K	43	60	177	19.1516	2	15-20 years	6-8 h	6-8 h	1	0	0	0	0	1	0	0	0	1	0	0	0	0	0	0	0	0	5									51	10335	400	180	0	35	7500	400	0	0	16	2835	0	180
K	45	61	164	22.68	2	>20	6-8 h	>8	0	0	0	0	0	0	0	0	0	0	0	0	0	0	0	0	0	0										56	9270	1200	720	1800	39	6660	960	360	1200	17	2610	240	360
K	51	62	162	23.6244	2	>20	4-6 h	>8	1	0	1	0	0	1	0	0	0	1	0	1	0	0	0	0	0	0	4		4							52	9780	1480	540	400	35	7020	1480	180	200	17	2760	0	360
K	34	58	167	20.7967	2	10-14 years	2-4 h	2-4 h	0	0	0	0	0	0	0	1	0	0	0	0	0	0	0	0	1	0								4		49	10575	40	480	600	31	7890	40	240	300	18	2685	0	240
K	44	68	182	20.5289	2	>20	4-6 h	4-6 h	1	1	1	0	1	1	1	1	0	1	1	1	0	1	1	1	0	0	2	2	3		1	3	2			47	10365	1200	240	100	31	7530	1200	120	0	16	2835	0	120
K	54	55	158	22.0317	2	>20	4-6 h	4-6 h	0	0	0	0	0	0	0	0	0	0	0	0	0	0	0	0	0	0										53	9810	720	720	1200	35	7215	480	480	900	18	2595	240	240
K	50	60	162	22.8624	2	>20	6-8 h	6-8 h	1	0	0	0	1	1	0	1	0	1	0	0	0	1	1	0	1	0	5				6	6		8		43	10693.5	620	360	360	30	7987.5	300	0	0	13	2706	320	360
K	40	60	170	20.7612	2	15-20 years	4-6 h	4-6 h	0	0	0	0	0	0	0	0	0	0	0	0	0	0	0	0	0	0										51	10005	1000	240	0	36	7260	720	120	0	15	2745	280	120
K	30	55	165	20.202	2	5-9 years	4-6 h	4-6 h	1	0	0	0	0	0	0	0	0	0	0	0	0	0	0	0	0	0										42	10897.5	460	360	0	30	7965	360	0	0	12	2932.5	100	360
K	50	75	165	27.5482	3	>20	6-8 h	6-8 h	1	0	0	0	1	1	0	1	0	0	0	0	0	1	1	0	1	0					3	3		5		38.5	10912.5	1020	360	0	27.5	8010	720	180	0	11	2902.5	300	180
K	58	75	160	29.2969	3	>20	6-8 h	6-8 h	0	0	0	0	1	1	0	0	0	0	0	0	0	1	1	0	0	0					8	7				36	11310	800	0	0	26	8250	560	0	0	10	3060	240	0
K	35	60	175	19.5918	2	10-14 years	4-6 h	<2	1	1	0	0	0	1	0	0	0	0	0	0	0	0	0	0	0	0										43.5	10530	1680	180	0	27.5	8055	720	0	0	16	2475	960	180
K	45	62	172	20.9573	2	15-20 years	4-6 h	<2	1	0	0	0	0	1	0	0	0	1	0	0	0	0	0	0	0	0	3									42.5	10635	1640	180	0	27	8085	760	0	0	15.5	2550	880	180
M	46	79	178	24.9337	2	15-20 years	4-6 h	6-8 h	0	0	0	0	0	0	0	1	0	0	0	0	0	0	0	0	1	0										45.5	9150	4080	1200	0	30.5	6975	2880	0	0	15	2175	1200	1200
K	56	61	158	24.4352	2	>20	4-6 h	<2	1	0	0	0	0	1	0	0	0	1	0	0	0	0	1	0	0	0	2					2				40.5	9885	3640	360	0	27.5	7230	2680	360	0	13	2655	960	0
K	61	69	158	27.6398	3	>20	4-6 h	6-8 h	1	1	0	0	1	1	0	1	0	1	1	0	0	1	1	0	1	0	6	5			3	7		7		47	10350	1440	0	0	31	7612.5	1060	0	0	16	2737.5	380	0
K	47	83	164	30.8596	4	>20	>8	>8	0	0	0	0	0	0	0	1	1	0	0	0	0	0	0	0	1	1								10	5	44	10365	1000	780	900	30	7650	600	600	500	14	2715	400	180
K	36	59	170	20.4152	2	10-14 years	4-6 h	4-6 h	0	0	0	0	0	0	0	0	0	0	0	0	0	0	0	0	0	0										53	9090	2160	1500	500	37	6555	1720	900	300	16	2535	440	600
K	56	85	167	30.478	4	>20	6-8 h	6-8 h	0	0	0	0	0	1	0	1	0	0	0	0	0	0	1	0	1	0						7		6		38	10455	1480	1200	800	27	7950	1120	0	0	11	2505	360	1200
K	55	85	150	37.7778	4	>20	6-8 h	6-8 h	0	0	1	0	0	1	0	1	0	0	0	1	0	0	1	0	0	0			4			4				43	10665	680	240	0	33	7635	440	120	0	10	3030	240	120
K	40	68	170	23.5294	2	15-20 years	4-6 h	6-8 h	1	0	0	0	1	0	0	0	0	1	0	0	0	1	0	0	0	0	4				4					39	11250	480	360	0	25	8400	280	180	0	14	2850	200	180
K	35	70	166	25.4028	3	10-14 years	6-8 h	6-8 h	1	0	0	0	0	0	0	0	0	1	0	0	0	0	0	0	0	0	4									44	10545	1040	540	0	30	7845	560	180	0	14	2700	480	360
K	50	90	165	33.0579	4	>20	6-8 h	6-8 h	0	0	0	0	0	1	0	1	1	0	0	0	0	0	1	0	1	1						4		4	5	35	11505	520	0	0	25	8415	360	0	0	10	3090	160	0
K	24	50	160	19.5312	2	<5	6-8 h	6-8 h	0	0	0	0	0	0	0	0	0	0	0	0	0	0	0	0	0	0										52	9630	1320	1620	0	35	7200	600	900	0	17	2430	720	720
K	33	72	170	24.9135	2	5-9 years	6-8 h	6-8 h	0	0	0	0	0	0	0	0	0	0	0	0	0	0	0	0	0	0										46	10305	840	720	0	32	7785	360	0	0	14	2520	480	720
K	55	65	163	24.4646	2	>20	6-8 h	6-8 h	0	0	1	1	0	0	0	0	0	0	0	0	1	0	0	0	0	0				5						49	10230	560	720	0	35	7455	280	360	0	14	2775	280	360
K	37	67	170	23.1834	2	10-14 years	4-6 h	4-6 h	1	0	0	1	0	0	0	0	0	1	0	0	1	0	0	0	0	0	2			3						44	10590	800	720	0	30	8025	200	0	0	14	2565	600	720
K	57	90	164	33.4622	4	>20	6-8 h	6-8 h	1	1	1	0	1	0	0	1	0	1	0	0	0	1	0	0	1	0	4				4			5		42	10575	1080	720	0	30	7875	600	0	0	12	2700	480	720
K	34	65	170	22.4913	2	10-14 years	6-8 h	6-8 h	1	0	0	0	0	1	0	1	0	0	0	0	0	0	1	0	0	0						4				42	10920	520	180	0	29	8032.5	360	90	0	13	2887.5	160	90
K	35	60	171	20.5191	2	5-9 years	6-8 h	6-8 h	0	0	0	0	0	0	0	0	0	0	0	0	0	0	0	0	0	0										47	10785	280	0	0	31	7935	200	0	0	16	2850	80	0
K	47	90	165	33.0579	4	15-20 years	6-8 h	6-8 h	1	0	0	0	1	1	0	1	0	0	0	0	0	1	1	0	1	0					5	6		8		44	10965	280	0	0	30	8025	200	0	0	14	2940	80	0
K	49	64	170	22.1453	2	15-20 years	4-6 h	4-6 h	0	0	0	0	0	0	1	1	0	0	0	0	0	0	0	1	1	0								3	3	41	10125	2160	1440	0	28	7470	1680	720	0	13	2655	480	720
K	25	49	160	19.1406	2	<5	4-6 h	>8	1	0	0	0	0	1	0	0	0	1	0	0	0	0	0	0	0	0	4									45	9810	1440	2160	0	32	7110	1440	1080	0	13	2700	0	1080
M	33	76	183	22.694	2	5-9 years	6-8 h	>8	1	1	1	0	0	1	0	0	0	1	1	1	0	0	1	0	0	0	4	4	4			6				51.5	9577.5	1520	630	1200	35.5	7027.5	1120	450	300	16	2550	400	180
K	33	58	160	22.6562	2	5-9 years	4-6 h	6-8 h	1	0	1	1	0	1	0	1	0	1	0	1	1	0	1	0	1	0	1		3	5		6		5		46.5	10365	1080	300	0	32.5	7455	920	300	0	14	2910	160	0
K	44	75	160	29.2969	3	5-9 years	4-6 h	4-6 h	1	1	0	0	0	1	0	0	0	1	1	0	0	0	1	0	0	0	1	1				3				53	9997.5	940	0	0	37	7207.5	700	0	0	16	2790	240	0
K	47	85	164	31.6032	4	>20	4-6 h	6-8 h	1	1	1	0	0	0	0	1	1	1	1	1	0	0	0	0	1	1	5	4	4					4	5	51	10110	1120	0	0	35	7380	720	0	0	16	2730	400	0
M	39	94	186	27.1708	3	5-9 years	>8	>8	1	0	1	1	1	0	1	0	0	1	0	1	1	1	0	1	0	0	2		2	2	2		1	0		55	8955	2000	540	1600	39	6480	1160	540	1600	16	2475	840	0
K	32	67	162	25.5296	3	5-9 years	6-8 h	6-8 h	1	0	0	0	0	1	0	1	0	1	0	0	0	0	1	0	1	0	3					4		1		49	10080	1200	360	0	35	7320	640	360	0	14	2760	560	0
K	29	60	172	20.2812	2	<5	2-4 h	4-6 h	1	0	0	0	0	1	0	0	0	1	0	0	0	0	1	0	0	0	5					5				42.5	10725	960	360	200	30.5	7695	800	240	0	12	3030	160	120
K	44	75	157	30.4272	4	>20	4-6 h	6-8 h	1	1	1	0	1	1	0	0	1	1	1	1	0	1	1	0	0	1	6	6	6		7	4			3	60	9450	960	0	0	42	6780	640	0	0	18	2670	320	0
K	31	60	166	21.7738	2	<5	4-6 h	6-8 h	1	0	1	0	1	0	0	0	0	0	0	0	0	0	0	0	0	0										46	10455	1160	0	0	32	7635	760	0	0	14	2820	400	0
M	29	68	175	22.2041	2	<5	4-6 h	4-6 h	0	1	0	0	0	1	0	0	0	0	1	0	0	0	1	0	0	0		4				2				58	9352.5	920	450	0	43.5	6562.5	760	150	0	14.5	2790	160	300
M	38	95	185	27.7575	3	10-14 years	>8	6-8 h	0	0	0	1	1	0	0	0	0	0	0	0	1	1	0	0	0	0				3	5					48.5	10312.5	860	480	0	32.5	7582.5	700	120	0	16	2730	160	360
K	33	50	164	18.5901	1	5-9 years	>8	>8	0	0	0	0	0	1	0	0	0	0	0	0	0	0	1	0	0	0						7				59	9292.5	660	840	1600	39	6885	440	720	400	20	2407.5	220	120
K	35	75	167	26.8923	3	5-9 years	4-6 h	4-6 h	1	0	1	0	0	1	0	1	1	1	0	1	0	0	1	0	1	1	6		4			6		5	2	50	9847.5	1100	540	1500	34.5	7095	760	360	1500	15.5	2752.5	340	180
K	30	64	165	23.5078	2	5-9 years	4-6 h	4-6 h	1	1	1	0	0	1	0	1	0	1	0	1	0	0	1	0	1	0	4		2			5		6		56	9300	1240	540	1200	40	6600	1000	540	600	16	2700	240	0
M	34	65	170	22.4913	2	5-9 years	4-6 h	4-6 h	1	0	0	0	0	1	0	1	1	1	0	0	0	0	1	0	1	1	3					7		8	2	47	10207.5	1500	120	1200	30.5	7507.5	1140	120	600	16.5	2700	360	0
K	41	56	168	19.8413	2	10-14 years	6-8 h	6-8 h	1	1	0	0	0	1	1	1	1	1	1	0	0	0	1	1	1	1	5	5				8	4	5	5	51.5	9810	1920	180	0	35.5	7065	1320	180	0	16	2745	600	0
K	66	71	174	23.4509	2	>20	6-8 h	6-8 h	1	0	0	0	0	0	0	1	0	1	0	0	0	0	0	0	1	0	7					0		7		59	9382.5	1380	0	0	41	6742.5	980	0	0	18	2640	400	0
K	54	50	160	19.5312	2	>20	4-6 h	4-6 h	1	1	1	0	1	1	0	1	0	1	0	0	0	0	1	0	1	0	5					3		7		47.5	9720	2760	0	0	34	7065	1800	0	0	13.5	2655	960	0
K	31	58	163	21.83	2	<5	4-6 h	4-6 h	1	1	1	0	0	1	0	1	0	1	1	0	0	0	1	0	1	0	3		2			4		2		42	9810	2640	720	1200	30	7065	2160	540	600	12	2745	480	180
K	36	80	172	27.0416	3	5-9 years	>8	>8	0	0	0	0	0	1	0	1	0	0	0	0	0	0	1	0	1	0						5		3		50	9450	2640	720	0	32	6930	2160	720	0	18	2520	480	0
K	43	60	166	21.7738	2	15-20 years	>8	>8	1	1	1	1	1	1	1	1	1	1	1	1	1	1	1	1	1	1	6	3	2	1	1	3	1	1	5	59	7954.5	2060	0	0	40	5344.5	1820	0	0	19	2610	240	0
M	37	110	180	33.9506	4	5-9 years	>8	>8	0	0	1	0	1	1	0	1	1	1	0	1	0	0	1	0	1	1	5		3	0		7		4	3	50.5	9832.5	1040	630	700	37.5	6907.5	840	630	300	13	2925	200	0
K	36	90	169	31.5115	4	10-14 years	4-6 h	6-8 h	1	1	1	0	0	1	0	1	1	0	0	1	0	0	1	0	0	1	0		6	0		4			7	46	10402.5	1540	0	0	30	7612.5	1300	0	0	16	2790	240	0
K	39	67	173	22.3863	2	10-14 years	4-6 h	4-6 h	1	0	0	0	0	0	0	1	0	1	0	0	0	0	0	0	1	0	4							5		47	10117.5	860	1440	0	33	7357.5	540	1080	0	14	2760	320	360
M	35	80	189	22.3958	2	10-14 years	4-6 h	4-6 h	1	1	1	1	1	1	1	1	1	1	1	1	1	1	1	1	1	1	5	4	6	5	3	5	5	5	7	58.5	9045	1320	0	1800	41	6630	800	0	1200	17.5	2415	520	0
M	28	79	182	23.8498	2	<5	2-4 h	4-6 h	1	1	1	1	1	1	1	1	1	1	1	1	1	1	1	1	1	1	4	1	1	1	4	5	1	2	1	42	10612.5	1100	180	600	30	7822.5	620	180	0	12	2790	480	0
K	31	82	178	25.8806	3	5-9 years	4-6 h	6-8 h	1	1	0	1	0	1	0	1	1	1	1	0	1	0	1	0	1	1	7	3		3		8		6	7	52.5	10065	920	300	0	34.5	7470	520	120	0	18	2595	400	180
K	40	88	158	35.2508	4	15-20 years	>8	>8	0	0	0	0	0	0	0	0	0	0	0	0	0	0	0	0	0	0										58.5	8805	2300	1110	0	39.5	6472.5	1560	750	0	19	2332.5	740	360
K	25	65	175	21.2245	2	<5	4-6 h	6-8 h	1	1	1	0	1	1	1	1	0	1	1	0	0	1	1	0	1	0	2	8			5	7		8		45	10177.5	1800	720	850	30	7342.5	1440	360	850	15	2835	360	360
K	60	82	163	30.863	4	>20	>8	>8	1	1	1	1	1	1	1	1	1	1	1	1	1	1	1	1	1	1	3	4	3	2	2	6	4	7	2	54	9270	2400	0	0	38	6667.5	1900	0	0	16	2602.5	500	0
K	28	48	161	18.5178	1	<5	4-6 h	6-8 h	1	1	1	1	0	1	1	1	1	1	1	1	1	0	1	0	1	1	7	5	7	3		9		2	2	46.5	10200	1480	720	0	30.5	7470	1080	720	0	16	2730	400	0
M	27	89	179	27.7769	3	<5	4-6 h	<2	0	0	0	0	0	0	0	0	0	0	0	0	0	0	0	0	0	0										49	9720	1200	1080	1200	35	7065	600	720	1200	14	2655	600	360
K	33	56	164	20.8209	2	10-14 years	2-4 h	4-6 h	0	0	0	0	0	0	0	0	0	0	0	0	0	0	0	0	0	0										57	9255	1680	240	1500	38	6705	1160	240	1200	19	2550	520	0
K	30	48	156	19.7239	2	<5	4-6 h	4-6 h	1	0	0	0	0	1	1	0	0	1	0	0	0	0	1	0	0	0	2					4				52.5	9900	1320	0	0	36.5	7215	800	0	0	16	2685	520	0
K	30	49	164	18.2183	1	5-9 years	2-4 h	<2	1	0	0	1	1	1	0	1	1	1	0	0	0	0	1	0	1	1	3					8		8	7	49	9765	2040	180	300	35	7020	1440	180	300	14	2745	600	0
K	31	58	163	21.83	2	<5	<2	<2	1	1	1	1	1	1	0	1	1	1	1	1	1	1	1	0	1	1	3	1	1	1	1	1		2	2	46.5	9600	2840	720	0	32.5	6990	2120	360	0	14	2610	720	360
K	33	80	172	27.0416	3	10-14 years	>8	>8	0	0	0	0	0	1	0	1	0	0	0	0	0	0	1	0	1	0						5		3		47	10020	2320	0	0	32	7290	1680	0	0	15	2730	640	0
K	40	65	161	25.0762	3	10-14 years	<2	>8	1	0	1	0	1	0	0	0	0	1	0	1	0	1	0	0	0	0	6		3		2					57	6840	8400	180	300	39	4995	6000	0	300	18	1845	2400	180
K	51	72	161	27.7767	3	15-20 years	2-4 h	6-8 h	1	0	1	0	1	0	0	0	1	1	0	1	0	1	0	0	0	1	5		5		3				2	56	8055	5400	720	0	36	5655	4600	720	0	20	2400	800	0
K	42	74	167	26.5338	3	10-14 years	<2	4-6 h	0	0	1	0	1	1	1	0	0	0	0	0	0	1	0	1	0	0					3		2			56.5	8565	3800	720	300	36.5	6300	3000	360	0	20	2265	800	360
K	50	66	163	24.841	2	>20	6-8 h	6-8 h	0	0	0	0	0	1	0	1	1	0	0	0	0	0	1	0	1	1						4		2	2	58	7755	2760	3420	2900	38	5745	2160	2400	1500	20	2010	600	1020
K	34	62	162	23.6244	2	10-14 years	4-6 h	6-8 h	1	0	1	0	0	0	0	0	1	1	0	1	0	0	0	0	0	1	4		3						5	49	8287.5	5800	360	450	35	5707.5	5000	0	450	14	2580	800	360
K	49	75	160	29.2969	3	>20	4-6 h	6-8 h	1	0	1	0	0	0	0	0	0	1	0	1	0	0	0	0	0	0	3		3							42	8280	5520	3240	0	30	6300	3360	2160	0	12	1980	2160	1080
K	41	70	168	24.8016	2	15-20 years	2-4 h	4-6 h	1	0	0	0	0	1	0	0	0	0	0	0	0	0	1	0	0	0						2				49	9135	2760	1800	0	34	7020	1320	900	0	15	2115	1440	900
K	36	52	161	20.061	2	10-14 years	4-6 h	6-8 h	1	1	1	0	0	1	1	0	0	1	1	1	0	0	1	1	0	0	3	7	7			3	7			55.5	7530	5600	1080	2100	37.5	5565	4000	360	1800	18	1965	1600	720
K	43	67	162	25.5296	3	15-20 years	<2	2-4 h	1	1	1	0	0	1	0	1	0	0	0	1	0	0	1	0	0	0	4	3	6			7		2		42	10230	1520	2160	0	26	7710	720	1920	0	16	2520	800	240
M	46	85	181	25.9455	3	15-20 years	6-8 h	>8	1	0	0	0	1	1	0	0	0	1	0	0	0	1	1	0	0	0	3				2	4				56	9262.5	2000	270	0	40	6562.5	1520	270	0	16	2700	480	0
K	44	70	165	25.7117	3	15-20 years	6-8 h	6-8 h	1	0	1	0	0	1	0	0	0	1	0	1	0	0	1	0	0	0	2		5			2				54	8775	4080	0	300	36	6405	3080	0	0	18	2370	1000	0
K	34	64	164	23.7954	2	10-14 years	2-4 h	4-6 h	0	0	0	0	1	0	0	0	0	0	0	0	0	1	0	0	0	0					1					55	8160	5600	360	0	35	6150	4000	0	0	20	2010	1600	360
M	50	79	178	24.9337	2	>20	4-6 h	6-8 h	0	0	1	0	1	0	1	0	0	0	0	1	0	1	0	1	0	0			4		2		4			56	8940	2800	0	600	40	6450	2000	0	0	16	2490	800	0
K	36	64	170	22.1453	2	15-20 years	2-4 h	4-6 h	0	0	0	0	1	0	0	0	0	0	0	0	0	1	0	0	0	0					2					51	7905	7000	360	0	33	5910	5000	180	0	18	1995	2000	180
K	50	68	164	25.2826	3	>20	6-8 h	>8	1	0	0	0	1	0	0	0	1	1	0	0	0	1	0	0	0	1	1				2				2	51	9210	3280	360	0	35	6780	2320	0	0	16	2430	960	360
K	39	71	167	25.4581	3	15-20 years	4-6 h	6-8 h	0	0	0	0	0	1	0	0	0	0	0	0	0	0	1	0	0	0						1				50	8385	5600	180	0	36	6015	4000	180	0	14	2370	1600	0
K	51	70	162	26.6728	3	>20	2-4 h	4-6 h	1	0	1	0	1	1	0	0	0	1	0	1	0	1	1	0	0	0	3		1		2	2				50	9180	3360	180	300	36	6615	2400	180	0	14	2565	960	0
K	35	68	170	23.5294	2	10-14 years	2-4 h	>8	0	0	0	0	0	0	0	0	0	0	0	0	0	0	0	0	0	0										51	8625	4960	0	300	35	6390	3360	0	0	16	2235	1600	0
K	30	70	166	25.4028	3	5-9 years	4-6 h	>8	1	0	0	0	1	0	0	0	0	1	0	0	0	1	0	0	0	0	2				3					52	7980	6440	180	600	35	5790	4600	180	600	17	2190	1840	0
K	47	71	160	27.7344	3	>20	2-4 h	>8	0	0	1	0	1	0	0	1	0	0	0	1	0	1	0	0	1	0			2		1			2		56	9405	1680	180	0	40	6705	1200	180	0	16	2700	480	0
M	42	80	174	26.4236	3	10-14 years	2-4 h	4-6 h	0	0	0	0	0	1	0	1	1	0	0	0	0	0	0	0	0	0						3		3	3	51	9360	2400	1080	0	35	7020	1440	360	0	16	2340	960	720
K	32	57	160	22.2656	2	5-9 years	4-6 h	6-8 h	0	0	0	0	0	1	1	0	1	0	0	0	0	0	0	0	0	0						4	2		2	54	9000	3120	360	600	37	6840	1680	0	0	17	2160	1440	360
K	47	64	165	23.5078	2	>20	<2	2-4 h	1	1	0	1	0	1	1	1	1	0	0	0	0	0	1	0	1	0	3	3		3		3	3	2	5	48	8550	5520	360	600	33	6030	4320	360	600	15	2520	1200	0
K	40	70	153	29.903	3	15-20 years	4-6 h	6-8 h	1	0	0	0	0	1	0	1	1	1	0	0	0	0	1	0	1	1	4					2		3	3	57	8190	5040	0	0	40	5850	3600	0	0	17	2340	1440	0
K	44	70	164	26.0262	3	15-20 years	2-4 h	6-8 h	1	0	1	0	0	0	0	1	1	1	0	1	0	0	0	0	1	0	2		3					4		52	8947.5	3640	630	400	34	6540	2800	360	400	18	2407.5	840	270
M	48	87	176	28.0863	3	>20	2-4 h	>8	0	0	0	0	1	1	0	0	0	0	0	0	0	1	1	0	0	0					2	4				55	8685	3720	360	0	39	6075	3000	360	0	16	2610	720	0
K	47	70	167	25.0995	3	>20	2-4 h	>8	0	0	0	0	0	1	0	0	0	1	0	0	0	0	1	0	0	0	2					4				55	8595	3800	240	600	39	6105	3000	240	0	16	2490	800	0
K	42	69	165	25.3444	3	15-20 years	<2	4-6 h	1	0	0	0	0	1	0	0	0	1	0	0	0	0	1	0	0	0	3					1				53.5	8910	3360	360	300	37.5	6330	2560	360	300	16	2580	800	0
K	33	64	164	23.7954	2	5-9 years	2-4 h	4-6 h	0	0	0	0	0	0	0	0	0	0	0	0	0	0	0	0	0	0										49	7710	7400	540	0	35	5407.5	5800	270	0	14	2302.5	1600	270
M	48	86	182	25.963	3	>20	2-4 h	4-6 h	1	0	0	0	0	0	1	0	0	1	0	0	0	0	0	1	0	0	3						1			42	8070	8000	360	0	30	5700	6400	0	0	12	2370	1600	360
K	50	69	161	26.6193	3	>20	2-4 h	4-6 h	0	0	1	0	0	0	0	0	1	0	0	1	0	0	0	0	0	1			4						3	49	8100	6480	360	0	35	5355	6000	180	0	14	2745	480	180
K	29	70	163	26.3465	3	<5	2-4 h	4-6 h	0	0	0	0	0	0	1	1	0	0	0	0	0	0	0	1	1	0							2	2		48	9345	3280	1080	300	30	7020	2400	720	0	18	2325	880	360
K	39	65	170	22.4913	2	10-14 years	2-4 h	>8	1	0	0	0	0	0	0	1	0	1	0	0	0	0	0	0	1	0	3							2		52	8985	3360	240	600	37	6570	2400	0	0	15	2415	960	240
M	45	87	180	26.8519	3	15-20 years	4-6 h	>8	0	0	0	0	0	1	0	0	0	0	0	0	0	0	1	0	0	0						1				51	9660	1840	360	600	35	7050	1360	0	600	16	2610	480	360
K	31	62	162	23.6244	2	5-9 years	2-4 h	>8	0	0	1	0	0	0	0	0	0	0	0	1	0	0	0	0	0	0			2						1	56	8610	3680	360	0	40	6075	2880	180	0	16	2535	800	180
K	52	64	168	22.6757	2	>20	6-8 h	>8	0	0	0	0	0	1	0	1	1	0	0	0	0	0	1	0	1	1						3		2	1	51	8475	5240	360	0	35	5985	4440	0	0	16	2490	800	360
M	31	85	180	26.2346	3	<5	4-6 h	>8	0	0	1	0	0	0	0	0	0	0	0	1	0	0	0	0	0	0			4							56	7605	6240	360	300	40	5175	5280	0	300	16	2430	960	360
K	28	58	160	22.6562	2	<5	4-6 h	>8	0	0	0	0	0	0	0	0	0	0	0	0	0	0	0	0	0	0										51	7515	8000	0	700	35	5190	6400	0	400	16	2325	1600	0
M	37	90	187	25.7371	3	10-14 years	2-4 h	>8	0	0	0	0	0	0	1	0	0	0	0	0	0	0	0	1	0	0							2			48	8250	6560	720	0	30	5910	5360	720	0	18	2340	1200	0
K	30	61	159	24.1288	2	<5	4-6 h	>8	0	0	0	0	0	0	0	0	0	0	0	0	0	0	0	0	0	0										51	8010	6400	480	0	35	5730	4800	480	0	16	2280	1600	0
K	35	70	170	24.2215	2	5-9 years	<2	2-4 h	0	1	1	1	0	1	1	0	0	0	0	0	1	0	1	1	0	0				3		1	2			54.5	9600	1640	360	0	37.5	7065	720	360	0	17	2535	920	0
K	47	73	166	26.4915	3	>20	<2	2-4 h	1	1	1	0	1	1	1	1	1	0	0	1	0	0	1	1	0	1			7			8	6		3	45.5	10365	1560	300	0	31.5	7590	840	240	0	14	2775	720	60
M	39	70	165	25.7117	3	10-14 years	2-4 h	4-6 h	1	0	0	0	0	1	0	0	0	1	0	0	0	0	0	0	0	0	3									56.5	9780	800	0	0	40	6990	560	0	0	16.5	2790	240	0
K	30	61	168	21.6128	2	<5	2-4 h	4-6 h	0	0	1	0	1	0	0	1	0	0	0	1	0	0	0	0	1	0			5					3		61.5	8865	2400	0	0	42.5	6255	1920	0	0	19	2610	480	0
K	37	69	172	23.3234	2	15-20 years	4-6 h	>8	0	0	1	0	1	0	0	0	0	0	0	0	0	1	0	0	0	0					8					50.5	9967.5	840	600	650	34.5	7365	600	300	200	16	2602.5	240	300
K	28	55	166	19.9594	2	<5	4-6 h	6-8 h	0	1	1	0	0	1	1	1	1	0	0	1	0	0	0	1	1	0			5				2	4		54	9225	2520	360	0	39	6525	1800	360	0	15	2700	720	0
K	32	62	170	21.4533	2	5-9 years	<2	4-6 h	1	0	0	0	0	0	0	0	0	1	0	0	0	0	0	0	0		3									46	10245	1200	420	1200	30	7515	1080	300	700	16	2730	120	120
K	36	54	160	21.0937	2	10-14 years	4-6 h	6-8 h	1	0	0	1	0	1	0	0	0	1	0	0	0	0	1	0	0	0	3					7				49	9255	3560	480	0	33	6825	2360	480	0	16	2430	1200	0
M	52	85	173	28.4005	3	>20	2-4 h	4-6 h	1	0	0	0	0	1	1	0	0	0	0	0	0	0	1	1	0	0						9	4			45	10485	840	540	0	32.5	7485	680	540	0	12.5	3000	160	0
M	29	88	193	23.6248	2	5-9 years	<2	<2	1	0	0	0	0	0	0	1	1	0	0	0	0	0	0	0	1	1								5	7	52	9315	1480	1260	2000	35	6795	1200	900	1200	17	2520	280	360
K	26	65	173	21.7181	2	<5	2-4 h	4-6 h	0	0	1	0	0	1	1	0	0	0	0	0	0	0	0	0	0	0										59	8340	3400	780	0	42	6150	1960	540	0	17	2190	1440	240
M	47	92	188	26.0299	3	15-20 years	4-6 h	6-8 h	0	0	0	0	0	0	1	1	0	0	0	0	0	0	0	0	0	0										51	10245	800	300	0	35	7320	680	300	0	16	2925	120	0
K	60	55	163	20.7008	2	>20	4-6 h	6-8 h	1	1	0	0	1	1	1	1	1	1	1	0	0	0	1	1	0	0	3	4				5	3			43	10597.5	1380	0	0	30.5	7777.5	740	0	0	12.5	2820	640	0
M	28	72	177	22.9819	2	<5	<2	2-4 h	0	0	0	0	0	0	0	0	0	0	0	0	0	0	0	0	0	0										59.5	8745	1440	1860	1300	39.5	6315	1080	1500	1000	20	2430	360	360
M	42	73	170	25.2595	3	15-20 years	4-6 h	>8	1	0	1	0	0	1	0	0	1	0	0	1	0	0	1	0	0	0			7			6				48.5	10260	600	360	600	32.5	7635	520	180	0	16	2625	80	180
K	45	70	180	21.6049	2	15-20 years	6-8 h	>8	0	1	1	0	0	0	0	1	1	0	0	0	0	0	0	0	1	0								4		66	8415	2400	180	0	46	5850	2040	180	0	20	2565	360	0
K	32	58	166	21.048	2	5-9 years	4-6 h	>8	1	1	1	0	1	1	0	1	0	1	0	0	0	1	0	0	0	0	4				6					61.5	9555	800	0	0	40.5	6870	760	0	0	21	2685	40	0
K	29	60	164	22.3081	2	5-9 years	4-6 h	6-8 h	0	0	0	0	0	0	0	0	0	0	0	0	0	0	0	0	0	0										54.5	9645	1160	180	0	38.5	7005	880	0	0	16	2640	280	180
K	41	65	172	21.9713	2	10-14 years	2-4 h	4-6 h	1	1	0	0	1	1	0	1	1	0	0	0	0	0	1	0	0	1						6			2	56	9615	1480	0	0	38	7035	920	0	0	18	2580	560	0
K	53	58	159	22.9421	2	>20	6-8 h	>8	1	1	1	0	0	1	1	1	1	0	0	1	0	0	0	1	0	0			3				6			48	10395	840	0	0	32.5	7680	520	0	0	15.5	2715	320	0
M	37	119	190	32.964	4	10-14 years	4-6 h	>8	0	0	0	0	0	1	0	1	1	0	0	0	0	0	0	0	1	0								9		63	9300	600	60	0	45	6540	520	60	0	18	2760	80	0
M	32	101	186	29.1941	3	5-9 years	4-6 h	4-6 h	1	1	1	0	0	1	0	0	0	1	1	1	0	0	1	0	0	0	6	4	6			7				37	9630	2560	1440	3200	29	7380	1360	0	2000	8	2250	1200	1440
M	45	112	198	28.5685	3	15-20 years	6-8 h	>8	0	0	1	0	0	0	0	0	0	0	0	1	0	0	0	0	0	0			2							63	7125	5040	1380	1200	45	5055	3120	1380	1200	18	2070	1920	0
K	33	42	153	17.9418	1	5-9 years	6-8 h	6-8 h	0	0	0	0	0	1	0	0	1	0	0	0	0	0	0	0	0	0										47	9247.5	2400	360	2250	37	6952.5	960	0	1050	10	2295	1440	360
M	58	98	178	30.9304	4	15-20 years	2-4 h	2-4 h	0	0	0	0	0	1	0	1	0	0	0	0	0	0	1	0	1	0						8		6		55	8550	3360	1080	1200	37	6210	2400	1080	600	18	2340	960	0
K	42	68	175	22.2041	2	15-20 years	4-6 h	4-6 h	1	1	1	0	0	1	0	1	0	1	1	1	0	0	1	0	1	0	3	4	6			8		2		58	9675	240	270	450	43	6772.5	120	270	300	15	2902.5	120	0
M	55	70	168	24.8016	2	>20	<2	2-4 h	1	0	1	1	0	1	0	1	1	1	0	0	0	0	1	0	0	0	8					4				42	10485	1120	1020	0	30	7530	960	840	0	12	2955	160	180
M	32	75	178	23.6713	2	5-9 years	2-4 h	4-6 h	1	0	0	1	1	0	0	0	0	0	0	0	0	0	0	0	0	0										64	8527.5	1320	930	2200	43.5	6067.5	1080	810	1400	20.5	2460	240	120
K	27	64	170	22.1453	2	<5	4-6 h	6-8 h	1	1	0	0	0	1	0	0	1	0	0	0	0	0	0	0	0	0										56	9105	2560	60	0	39	6495	2080	60	0	17	2610	480	0
M	30	93	182	28.0763	3	<5	<2	4-6 h	0	0	0	0	0	0	0	1	1	0	0	0	0	0	0	0	0	0										54.5	9510	1280	600	1400	36	7095	1040	300	0	18.5	2415	240	300
K	29	50	160	19.5312	2	<5	2-4 h	4-6 h	0	0	0	0	0	1	0	1	1	0	0	0	0	0	1	0	1	1						3		3	2	48.5	7335	6000	2520	3600	32.5	5565	4000	1800	2400	16	1770	2000	720
K	53	70	162	26.6728	3	>20	6-8 h	6-8 h	1	0	1	1	0	1	0	1	1	1	0	0	0	0	0	0	1	0	5							7		56	9615	1080	240	0	40	6870	720	240	0	16	2745	360	0
K	30	75	184	22.1526	2	5-9 years	<2	<2	0	0	0	1	0	0	0	0	0	0	0	0	1	0	0	0	0	0				2						47	9922.5	1520	600	1350	32	7267.5	800	600	1350	15	2655	720	0
M	28	97	181	29.6084	3	<5	2-4 h	4-6 h	0	0	0	0	0	1	0	0	0	0	0	0	0	0	0	0	0	0										59	9165	1200	810	850	40	6652.5	800	750	400	19	2512.5	400	60
K	45	75	163	28.2284	3	15-20 years	<2	4-6 h	1	0	0	0	1	1	0	1	0	0	0	0	0	0	1	0	0	0						5				51	9615	2040	600	0	35	7140	1200	240	0	16	2475	840	360
K	36	54	160	21.0937	2	10-14 years	2-4 h	2-4 h	0	0	0	0	0	0	0	0	0	0	0	0	0	0	0	0	0	0										56	9225	1200	540	1800	40	6585	800	540	1200	16	2640	400	0
K	58	70	163	26.3465	3	>20	>8	>8	1	0	0	1	0	1	0	1	0	0	0	0	0	0	1	0	0	0					5					42	10545	1280	540	0	30	7710	800	360	0	12	2835	480	180
M	34	75	172	25.3515	3	10-14 years	4-6 h	4-6 h	0	0	0	0	0	0	0	0	0	0	0	0	0	0	0	0	0	0										55.5	9060	1800	960	1000	39.5	6690	1000	480	400	16	2370	800	480
K	47	74	170	25.6055	3	>20	4-6 h	4-6 h	1	0	1	0	0	1	0	0	0	0	0	0	0	0	0	0	0	0										48.5	10110	1480	360	0	32.5	7440	920	360	0	16	2670	560	0
M	27	93	190	25.7618	3	<5	6-8 h	6-8 h	0	0	0	0	0	0	0	1	0	0	0	0	0	0	0	0	1	0								7		56	9330	2000	0	0	40	6600	1600	0	0	16	2730	400	0
K	51	75	172	25.3515	3	>20	4-6 h	>8	0	0	0	0	0	0	0	0	0	0	0	0	0	0	0	0	0	0										49.5	7635	6880	1620	0	35	5550	4880	1080	0	14.5	2085	2000	540
K	53	94	167	33.705	4	>20	4-6 h	6-8 h	0	0	0	0	0	0	0	0	0	0	0	0	0	0	0	0	0	0										53.5	10125	240	360	0	37.5	7290	120	360	0	16	2835	120	0
M	38	76	174	25.1024	3	15-20 years	4-6 h	4-6 h	1	0	0	0	0	1	0	1	1	1	0	0	0	0	1	0	1	1	3					8		6	2	56	9292.5	1920	0	450	40	6457.5	1920	0	150	16	2835	0	0
K	47	70	167	25.0995	3	>20	4-6 h	4-6 h	0	0	0	0	0	0	0	0	0	0	0	0	0	0	0	0	0	0										54	5670	10080	2520	0	40	4050	7200	1800	0	14	1620	2880	720
K	29	63	176	20.3383	2	5-9 years	4-6 h	4-6 h	1	0	1	0	0	1	0	0	0	0	0	1	0	0	1	0	0	0			3			3				43	9892.5	2060	1260	0	32	6945	1760	1260	0	11	2947.5	300	0
K	49	60	166	21.7738	2	>20	4-6 h	4-6 h	1	0	1	0	0	1	1	0	0	0	0	0	0	0	1	1	0	0						8	6			45	10710	560	450	250	30	7852.5	360	390	100	15	2857.5	200	60
K	34	60	165	22.0386	2	10-14 years	6-8 h	6-8 h	0	0	0	0	0	0	0	0	0	0	0	0	0	0	0	0	0	0										49	10065	1160	360	800	33	7320	880	240	800	16	2745	280	120
K	33	67.5	180	20.8333	2	10-14 years	4-6 h	4-6 h	0	0	0	0	1	1	0	0	0	0	0	0	0	0	1	0	0	0						9				49.5	5737.5	10800	3240	450	33.5	3847.5	8640	2520	450	16	1890	2160	720
K	35	77	170	26.6436	3	10-14 years	4-6 h	4-6 h	0	0	0	0	0	0	0	0	0	0	0	0	0	0	0	0	0	0										46	7920	7440	1080	0	30	5760	5760	720	0	16	2160	1680	360
K	35	62	167	22.231	2	5-9 years	4-6 h	4-6 h	0	0	0	0	0	0	0	0	0	0	0	0	0	0	0	0	0	0										40	9067.5	3360	2520	3150	28	6592.5	2400	1800	2250	12	2475	960	720
K	25	75	168	26.5731	3	<5	4-6 h	4-6 h	1	0	1	0	0	1	1	0	0	1	0	1	0	0	1	1	0	0	9		10			10	6			43.5	10305	2400	0	0	27.5	7785	1440	0	0	16	2520	960	0
M	27	73	173	24.3911	2	10-14 years	6-8 h	6-8 h	1	0	1	0	0	1	0	1	1	0	0	1	0	0	1	0	0	0			3			7				52	8640	2880	450	3450	37	6097.5	2400	180	2850	15	2542.5	480	270
M	26	120	187	34.3161	4	<5	4-6 h	4-6 h	0	0	0	0	0	0	0	0	0	0	0	0	0	0	0	0	0	0										53	9465	1520	720	1200	37	6855	920	720	600	16	2610	600	0
K	36	68	170	23.5294	2	10-14 years	4-6 h	6-8 h	1	1	1	0	0	1	0	0	0	1	1	1	0	0	1	0	0	0	4	4	3			2				56	8460	2640	2520	0	40	5940	2160	1800	0	16	2520	480	720
M	35	93	190	25.7618	3	10-14 years	2-4 h	2-4 h	1	0	1	0	0	1	0	0	0	0	0	0	0	0	0	0	0	0										52.5	8505	3360	2520	0	36.5	6165	2400	1800	0	16	2340	960	720
K	39	70	170	24.2215	2	10-14 years	4-6 h	4-6 h	0	0	0	0	0	1	0	0	0	0	0	0	0	0	1	0	0	0						1				50	7470	8400	0	0	35	5400	6000	0	0	15	2070	2400	0
K	25	50	163	18.8189	2	<5	2-4 h	2-4 h	0	0	0	0	0	1	0	0	1	0	0	0	0	0	1	0	0	1						1			1	57.5	5085	11520	2430	750	38.5	3195	9600	1710	750	19	1890	1920	720
M	25	80	186	23.1241	2	<5	2-4 h	2-4 h	0	0	0	0	0	0	0	0	0	0	0	0	0	0	0	0	0	0										38	8475	6720	1440	1700	26	6360	4800	720	800	12	2115	1920	720
K	41		150		1	15-20 years	4-6 h	4-6 h	1	1	1	0	0	1	1	0	1	1	1	1	0	0	1	0	0	1	8	5	5			4			8	41.5	9382.5	2400	2070	2700	28.5	7065	1440	1440	1800	13	2317.5	960	630
K	50	80	165	29.3848	3	>20	6-8 h	>8	1	0	1	1	1	1	1	1	1	0	0	0	0	1	1	1	1	1					3	8	8	6	9	46	7560	8880	0	0	33	5400	6480	0	0	13	2160	2400	0
K		63	162	24.0055	2	>20	4-6 h	4-6 h	1	1	1	0	1	1	0	0	0	0	0	1	0	1	1	0	0	0			5		5	7				44.5	8280	4680	3060	1500	30.5	5917.5	3720	2280	1150	14	2362.5	960	780
K	52	57	168	20.1956	2	>20	4-6 h	4-6 h	0	0	0	0	0	0	0	0	0	0	0	0	0	0	0	0	0	0										51	7980	3760	4560	0	35	5940	2640	2880	0	16	2040	1120	1680
K		60	162	22.8624	2	>20	6-8 h	6-8 h	0	0	0	0	1	1	0	0	0	0	0	0	0	0	0	0	0	0										51	5040	9360	7920	0	35	3420	7200	6120	0	16	1620	2160	1800
K	40	70	167	25.0995	3	15-20 years	6-8 h	4-6 h	0	0	0	0	0	0	0	0	0	0	0	0	0	0	0	0	0	0										56	9135	1560	1440	0	40	6525	1080	1080	0	16	2610	480	360
K	45	65	165	23.8751	2	15-20 years	4-6 h	4-6 h	1	0	1	0	1	1	1	1	0	0	0	0	0	0	1	1	0	0						8	8			36	9810	2640	2520	1800	24	7290	2160	1800	600	12	2520	480	720
K	45	58	158	23.2335	2	>20	4-6 h	4-6 h	0	0	1	0	0	0	0	1	1	0	0	1	0	0	0	0	0	0			4							53	9540	1680	360	600	39	6840	1200	0	0	14	2700	480	360
K	58	55	164	20.4491	2	>20	6-8 h	>8	0	0	1	0	0	1	1	0	0	0	0	1	0	0	1	1	0	0			2			2	2			46	9900	1440	1800	0	32.5	7080	1040	1620	0	13.5	2820	400	180
K	43	66	165	24.2424	2	15-20 years	6-8 h	6-8 h	0	0	0	0	1	0	0	0	0	0	0	0	0	0	0	0	0	0										52	8505	4800	540	0	36	6255	3360	180	0	16	2250	1440	360
K	30	51	160	19.9219	2	5-9 years	4-6 h	4-6 h	1	0	1	0	0	0	0	0	0	1	0	1	0	0	0	0	0	0	5		5							49	6750	9840	720	0	35	4500	8400	0	0	14	2250	1440	720
M	50	95	182	28.6801	3	>20	>8	>8	0	1	0	0	0	1	1	1	0	0	1	0	0	0	1	1	1	0		2				3	2	1		46	9765	2760	180	300	32	7200	1920	0	0	14	2565	840	180
M	52	69	172	23.3234	2	>20	>8	>8	0	1	0	0	0	1	1	1	0	0	1	0	0	0	1	1	1	0		2				3	3	2		51	8925	3120	840	900	37	6345	2360	600	600	14	2580	760	240
K	54	70	160	27.3437	3	>20	4-6 h	6-8 h	0	0	1	0	0	0	0	0	0	0	0	1	0	0	0	0	0	0			6							53.5	9502.5	2140	0	0	37.5	6960	1240	0	0	16	2542.5	900	0
K	52	73	164	27.1416	3	>20	6-8 h	6-8 h	1	1	1	0	1	0	0	1	0	0	0	1	0	1	0	0	1	0			6		6			8		46.5	10170	1800	0	0	32.5	7447.5	1140	0	0	14	2722.5	660	0
K	45	58	160	22.6562	2	>20	2-4 h	>8	1	0	1	0	0	0	0	0	0	1	0	1	0	0	0	0	0	0	5		6							53.5	7845	5240	1350	1050	37.5	5175	5240	690	750	16	2670	0	660
K	55	62.5	162	23.815	2	>20	>8	>8	1	1	1	0	1	1	0	1	0	1	1	1	0	1	1	0	0	0	5	6	5		8	7				47.5	7740	5000	3510	2050	32	5655	3720	2550	1550	15.5	2085	1280	960
M	44	92	176	29.7004	3	15-20 years	4-6 h	4-6 h	0	0	0	0	1	0	0	0	0	0	0	0	0	0	0	0	0	0										46	9585	3120	900	0	30	6975	2400	900	0	16	2610	720	0
M	38	86	180	26.5432	3	15-20 years	4-6 h	4-6 h	1	0	1	0	0	1	1	0	1	0	0	0	0	0	1	0	0	1						7			3	56	6270	4760	4860	5400	40	4350	3000	4140	4600	16	1920	1760	720
K	52	65	161	25.0762	3	15-20 years	4-6 h	6-8 h	1	0	0	0	0	1	0	0	1	1	0	0	0	0	1	0	0	1	5					4			4	53	9690	2000	0	0	35	7155	1320	0	0	18	2535	680	0
K	40	53	167	19.0039	2	15-20 years	4-6 h	4-6 h	0	1	0	0	0	0	1	0	0	0	1	0	0	0	0	1	0	0		2					3			56	8865	3040	0	500	40	6255	2320	0	500	16	2610	720	0
K	52	59	154	24.8777	2	>20	2-4 h	2-4 h	1	1	1	0	0	1	1	1	0	1	1	1	0	0	1	1	0	0	4	2	6			7	7			45	9990	2600	420	0	30	7650	1000	300	0	15	2340	1600	120
K	36	62	169	21.7079	2	10-14 years	4-6 h	4-6 h	0	0	0	0	0	0	0	0	0	0	0	0	0	0	0	0	0	0										55.5	9630	1200	0	900	37.5	6990	800	0	900	18	2640	400	0
K	32	67	160	26.1719	3	5-9 years	4-6 h	4-6 h	1	1	1	0	1	1	0	1	1	1	1	1	0	1	1	0	1	1	3	1	3			2		6	2	43	10770	320	360	1200	29	8025	200	0	600	14	2745	120	360
K	40	53	164	19.7055	2	10-14 years	>8	>8	0	0	0	0	0	0	0	0	0	0	0	0	0	0	0	0	0	0										46	9720	3120	360	0	30	7560	1440	0	0	16	2160	1680	360
K	35	56	164	20.8209	2	10-14 years	6-8 h	6-8 h	1	0	1	0	1	0	1	0	0	0	0	1	0	0	0	0	0	0			2							49	10230	860	270	0	35	7402.5	660	0	0	14	2827.5	200	270
M	51	85	180	26.2346	3	>20	4-6 h	4-6 h	0	0	0	0	0	1	1	1	0	0	0	0	0	0	1	1	1	0						6	6	4		50	9405	280	4080	0	35	6675	200	3600	0	15	2730	80	480
K	63	96	164	35.693	4	>20	>8	>8	0	0	0	0	0	1	0	0	0	0	0	0	0	0	0	0	0	0										49	9945	840	1260	300	35	7200	600	900	0	14	2745	240	360
K	45	59	166	21.4109	2	>20	>8	>8	1	1	1	1	1	1	1	1	1	1	1	1	1	1	1	1	1	1	7	8	7	1	1	9	3	3	2	48	10020	1440	0	1000	35	7140	960	0	1000	13	2880	480	0
K	42	75	168	26.5731	3	15-20 years	>8	>8	0	0	0	0	0	1	0	0	0	0	0	0	0	0	1	0	0	0						5				49	9360	3360	0	0	35	6840	2160	0	0	14	2520	1200	0
K	34	81	178	25.565	3	10-14 years	4-6 h	4-6 h	0	0	0	0	0	0	0	0	1	0	0	0	0	0	0	0	0	0										42	10215	1680	840	700	30	7425	1200	600	500	12	2790	480	240
K	54	75	174	24.7721	2	>20	>8	>8	1	1	1	0	0	1	1	1	1	1	1	1	0	0	1	1	1	1	5	3	3			4	4	3	5	55	7785	5520	900	0	40	5355	4320	900	0	15	2430	1200	0
K	39	77	174	25.4327	3	10-14 years	4-6 h	4-6 h	0	0	0	0	0	1	0	0	0	0	0	0	0	0	1	0	0	0						3				56	8640	3120	360	1200	40	6210	2400	0	600	16	2430	720	360
M	40	84	183	25.0829	3	15-20 years	4-6 h	6-8 h	0	0	0	0	0	1	0	0	0	0	0	0	0	0	1	0	0	0						1				59	9652.5	900	0	0	40	6862.5	900	0	0	19	2790	0	0
K	47	66	167	23.6652	2	>20	4-6 h	4-6 h	1	1	0	0	0	1	0	1	0	1	1	0	0	0	1	0	1	0	7	6				7		4		54.5	7020	8160	0	0	38	5130	6000	0	0	16.5	1890	2160	0
K	38	63	165	23.1405	2	15-20 years	4-6 h	4-6 h	0	0	0	0	0	0	0	0	0	0	0	0	0	0	0	0	0	0										39	10365	1880	1080	600	28	7605	1560	360	0	11	2760	320	720
K	45	65	168	23.03	2	10-14 years	4-6 h	6-8 h	0	0	1	1	0	1	1	0	0	0	0	0	1	0	1	1	0	0										37	10350	2640	360	1200	25	7620	1920	360	800	12	2730	720	0
K	40	68	165	24.977	2	5-9 years	4-6 h	6-8 h	0	1	0	0	0	1	0	1	0	0	0	0	0	0	0	0	0	0										46.5	10485	480	360	0	33.5	7560	360	360	0	13	2925	120	0
K	40	70	170	24.2215	2	15-20 years	4-6 h	4-6 h	0	0	0	0	0	1	0	0	0	0	0	0	0	0	1	0	0	0						5				52	8790	3360	1260	500	36	6360	2400	900	500	16	2430	960	360
K	38	48	156	19.7239	2	10-14 years	4-6 h	4-6 h	0	0	0	0	0	0	0	0	0	0	0	0	0	0	0	0	0	0										46	8887.5	3480	1800	1050	33	6465	2400	1350	850	13	2422.5	1080	450
M	32	85	186	24.5693	2	5-9 years	4-6 h	4-6 h	0	0	1	0	0	1	1	0	0	0	0	0	0	0	0	0	0	0										52	9525	720	1260	2200	37	6645	720	1260	1600	15	2880	0	0
K	47	64	170	22.1453	2	>20	4-6 h	4-6 h	1	1	1	0	1	1	0	0	0	1	1	1	0	1	1	0	0	0	5	5	5		5	5				48	9960	2480	0	0	30	7440	1760	0	0	18	2520	720	0
K	45	66	165	24.2424	2	10-14 years	4-6 h	4-6 h	0	0	0	0	0	1	0	0	0	0	0	0	0	0	1	0	0	0						6				50	10080	720	1080	0	34	7290	480	1080	0	16	2790	240	0
K	39	64	164	23.7954	2	10-14 years	6-8 h	6-8 h	1	0	0	0	0	1	1	0	0	1	0	0	0	0	0	1	0	0	3						2			46	9420	2120	1980	1200	32	6945	1520	1260	600	14	2475	600	720
K	50	64	164	23.7954	2	>20	4-6 h	4-6 h	1	0	1	0	0	1	0	0	0	0	0	0	0	0	0	0	0	0										49	9765	1080	1260	1500	33	7110	720	900	1500	16	2655	360	360
K	32	68	165	24.977	2	5-9 years	4-6 h	4-6 h	1	0	0	1	1	1	0	0	0	0	0	0	1	1	1	0	0	0				3	4	7				55	8730	3600	720	0	37	6570	2400	0	0	18	2160	1200	720
K	37	60	165	22.0386	2	10-14 years	4-6 h	4-6 h	1	0	0	0	1	1	0	0	0	1	0	0	0	1	1	0	0	0	2				3	7				48.5	9787.5	1860	1080	0	32.5	7245	1200	720	0	16	2542.5	660	360
M	64	68	172	22.9854	2	>20	4-6 h	>8	1	0	0	0	0	0	0	0	0	1	0	0	0	0	0	0	0	0	6									54.5	10260	240	0	0	38	7290	240	0	0	16.5	2970	0	0
M	39	86.5	180	26.6975	3	10-14 years	>8	>8	1	0	0	0	0	1	0	0	0	1	0	0	0	0	1	0	0	0	6					9				42	10890	240	720	0	30	7830	240	720	0	12	3060	0	0
M	29	78.2	182	23.6083	2	<5	>8	>8	0	0	0	0	0	0	0	1	0	0	0	0	0	0	0	0	0	0										60	9360	480	1440	0	40	6930	240	720	0	20	2430	240	720
M	30	97.2	182	29.3443	3	10-14 years	>8	>8	1	1	1	0	1	0	0	0	0	1	0	1	0	0	0	0	0	0	8		6							49	10305	300	810	0	35	7335	300	810	0	14	2970	0	0
M	51	90.3	180	27.8704	3	>20	>8	>8	0	1	1	0	0	0	0	1	0	0	0	0	0	0	0	0	0	0										42	10897.5	700	0	0	30	7927.5	460	0	0	12	2970	240	0
K	35	74.5	175	24.3265	2	<5	>8	>8	1	1	0	0	0	0	0	0	0	1	1	0	0	0	0	0	0	0	9	5								56	9960	120	300	0	40	7080	120	300	0	16	2880	0	0
K	39	71.7	170	24.8097	2	15-20 years	>8	>8	0	0	0	0	0	1	0	0	0	0	0	0	0	0	1	0	0	0						5				53.5	10260	240	180	0	38	7245	240	180	0	15.5	3015	0	0
K	33	63.5	172	21.4643	2	<5	>8	>8	0	1	0	0	0	0	0	0	0	0	0	0	0	0	0	0	0	0										57	9780	360	300	0	41	6945	240	300	0	16	2835	120	0
K	32	66.5	170	23.0104	2	5-9 years	>8	>8	1	1	0	0	0	1	0	0	0	1	1	0	0	0	1	0	0	0	7	10				4				52	10260	120	540	0	36	7380	120	540	0	16	2880	0	0
K	34	68.9	170	23.8408	2	5-9 years	>8	>8	0	0	0	0	0	1	0	1	0	0	0	0	0	0	0	0	1	0								1		45.5	10830	520	0	0	31.5	7905	160	0	0	14	2925	360	0
K	29	65.3	172	22.0727	2	5-9 years	>8	>8	1	1	1	0	0	1	0	0	0	1	0	1	0	0	0	0	0	0	10		9							58	9727.5	140	480	0	41	6952.5	100	480	0	17	2775	40	0
K	33	65.8	172	22.2418	2	5-9 years	>8	>8	1	1	1	0	0	0	0	0	0	1	1	0	0	0	0	0	0	0	5	5								62	9300	720	600	0	42	6690	480	600	0	20	2610	240	0
K	32	65.5	171	22.4001	2	5-9 years	>8	>8	1	1	0	0	0	0	0	0	0	1	1	0	0	0	0	0	0	0	6	4								59	9405	680	600	0	41	6795	440	600	0	18	2610	240	0
K	32	68.5	170	23.7024	2	5-9 years	>8	>8	1	0	1	0	0	0	0	0	0	1	0	1	0	0	0	0	0	0	9		6							49	10440	480	0	0	35	7470	480	0	0	14	2970	0	0
K	33	64.2	172	21.7009	2	5-9 years	>8	>8	1	1	0	0	0	0	0	0	0	1	1	0	0	0	0	0	0	0	7	5								59	9600	400	600	0	40	6945	280	600	0	19	2655	120	0
K	39	88.2	162	33.6077	4	10-14 years	4-6 h	4-6 h	0	0	0	0	0	1	0	0	0	0	0	0	0	0	1	0	0	0						6				57	9937.5	140	0	0	41	7072.5	100	0	0	16	2865	40	0
K	28	82.6	158	33.0876	4	<5	>8	>8	1	0	0	0	0	1	0	0	0	1	0	0	0	0	1	0	0	0	5					9				50	10260	960	0	0	34	7515	600	0	0	16	2745	360	0
K	30	72.1	165	26.483	3	5-9 years	>8	>8	1	1	1	0	0	1	0	0	0	0	0	0	0	0	1	0	0	0						9				49	10425	280	0	0	35	7545	280	0	0	14	2880	0	0
K	39	72.6	168	25.7228	3	5-9 years	>8	>8	1	1	0	0	0	0	1	0	0	1	1	0	0	0	0	0	0	0	8	8								50	10485	120	0	0	35	7620	80	0	0	15	2865	40	0
K	39	84.6	172	28.5965	3	5-9 years	>8	>8	0	0	0	0	0	0	0	0	0	0	0	0	0	0	0	0	0	0										55.5	10035	40	300	0	38.5	7245	40	300	0	17	2790	0	0
K	32	82.1	165	30.1561	4	5-9 years	6-8 h	6-8 h	0	0	1	0	0	0	0	0	0	0	0	1	0	0	0	0	0	0			5							54.5	10215	0	0	0	39	7290	0	0	0	15.5	2925	0	0
K	31	72.4	162	27.5873	3	<5	>8	>8	0	0	0	0	0	1	0	0	0	0	0	0	0	0	1	0	0	0						5				56	9810	720	0	0	40	6930	720	0	0	16	2880	0	0
K	39	75.2	165	27.6217	3	5-9 years	>8	>8	1	0	1	0	0	0	0	0	0	1	0	1	0	0	0	0	0	0	9		8							56	9810	720	0	0	40	7005	520	0	0	16	2805	200	0
K	41	75.2	165	27.6217	3	15-20 years	>8	>8	1	0	1	0	0	1	0	0	0	1	0	1	0	0	0	0	0	0	9		9							56	9960	320	0	0	40	7140	160	0	0	16	2820	160	0
K	34	72	163	27.0993	3	5-9 years	>8	>8	1	1	1	0	0	0	0	1	1	1	0	0	0	0	0	0	0	1	8								6	55	9817.5	1180	0	0	36	7297.5	700	0	0	19	2520	480	0
K	44	75.2	162	28.6542	3	15-20 years	>8	>8	1	1	1	0	0	0	0	1	1	1	1	1	0	0	0	0	0	1	5	7	6							51	10275	680	0	0	35	7395	680	0	0	16	2880	0	0
K	41	82.1	162	31.2833	4	10-14 years	6-8 h	6-8 h	1	0	1	0	0	0	0	0	0	1	0	1	0	0	0	0	0	0	5		3							44	11070	0	0	0	30	8100	0	0	0	14	2970	0	0
K	35	83.2	165	30.5601	4	10-14 years	>8	>8	1	0	0	0	0	1	0	0	0	0	0	0	0	0	1	0	0	0						7				51	10380	400	0	0	35	7575	200	0	0	16	2805	200	0
K	25	92.6	182	27.9556	3	<5	>8	>8	0	0	0	0	0	0	0	1	0	0	0	0	0	0	0	0	1	0								6		56	9930	400	0	0	40	7050	400	0	0	16	2880	0	0
K	25	74.5	168	26.396	3	<5	>8	>8	1	0	0	0	0	1	0	0	0	1	0	0	0	0	1	0	0	0	6					4				59	9795	280	0	0	40	7125	200	0	0	19	2670	80	0
K	25	80	170	27.6817	3	<5	6-8 h	>8	1	0	1	0	0	0	0	1	0	1	0	1	0	0	0	0	0	0	8		8							56	9825	280	600	0	40	7080	120	300	0	16	2745	160	300
K	27	80	171	27.3588	3	<5	6-8 h	>8	1	0	1	0	0	1	1	1	0	1	0	1	0	0	1	0	0	0	8					10				56	9825	280	600	0	40	7065	160	300	0	16	2760	120	300
K	39	72.1	168	25.5456	3	10-14 years	>8	>8	0	0	0	0	0	0	0	0	0	0	0	0	0	0	0	0	0	0										48	10560	400	0	0	33	7725	280	0	0	15	2835	120	0
K	33	72.4	168	25.6519	3	5-9 years	6-8 h	6-8 h	0	1	1	0	0	1	0	0	0	0	0	1	0	0	0	0	0	0			6							50	10492.5	340	0	0	35	7552.5	260	0	0	15	2940	80	0
[truncated: 15 more columns]
